1 **seRNA *PAM-1* regulates skeletal muscle satellite cell activation and aging through *trans***  
2 **regulation of *Timp2* expression synergistically with *Ddx5***

3 Karl Kam Hei So<sup>1,3,4</sup>, Yile Huang<sup>1,4</sup>, Suyang Zhang<sup>2</sup>, Liangqiang He<sup>1</sup>, Yuying Li<sup>1</sup>, Xiaona  
4 Chen<sup>2</sup>, Yu Zhao<sup>1</sup>, Yingzhe Ding<sup>1</sup>, Jiajian Zhou<sup>1</sup>, Jie Yuan<sup>1</sup>, Mai Har Sham<sup>3</sup>, Hao Sun<sup>1,5</sup>,  
5 Huating Wang<sup>2,5</sup>

6

7 <sup>1</sup>Department of Chemical Pathology, Li Ka Shing Institute of Health Sciences, The Chinese  
8 University of Hong Kong, Shatin, Hong Kong SAR, China.

9 <sup>2</sup>Department of Orthopaedics and Traumatology, Li Ka Shing Institute of Health Sciences,  
10 The Chinese University of Hong Kong, Shatin, Hong Kong SAR, China.

11 <sup>3</sup>School of Biomedical Sciences, The Chinese University of Hong Kong, Shatin, Hong Kong  
12 SAR, China

13 <sup>4</sup>These authors contribute equally to this paper as first authors

14 <sup>5</sup>Co-correspondence

15 **Address correspondence to:**

16 Huating Wang, 507A Li Ka Shing Institute of Health Sciences, Prince of Wales Hospital, The  
17 Chinese University of Hong Kong, Shatin, Hong Kong SAR, China. Phone: (852)3763-6047;  
18 Fax: (852)-2632-0008; E-mail: [huating.wang@cuhk.edu.hk](mailto:huating.wang@cuhk.edu.hk)

19 Hao Sun, 503, Li Ka Shing Institute of Health Sciences, Prince of Wales Hospital, The  
20 Chinese University of Hong Kong, Shatin, Hong Kong SAR, China. Phone: (852)3763-6048;  
21 E-mail [haosun@cuhk.edu.hk](mailto:haosun@cuhk.edu.hk)

22 **Running title:** seRNA *PAM-1* regulates muscle satellite cell activation and aging

23 **Keywords:** muscle satellite cell, *PAM-1*, *trans* regulation, *Ddx5*, muscle aging

24 **Conflict of interest:** the authors have declared that no conflict of interest exists.

25 **Abstract:**

26 Muscle satellite cells (SCs) are responsible for muscle homeostasis and regeneration; and  
27 lncRNAs play important roles in regulating SC activities. Here in this study, we identify  
28 *PAM-1* (Pax7 Associated Muscle lncRNA) that is induced in activated SCs to promote SC  
29 activation into myoblast cells upon injury. *PAM-1* is generated from a myoblast specific  
30 super-enhancer (SE); as a seRNA it binds with a number of target genomic loci  
31 predominantly in *trans*. Further studies demonstrate that it interacts with Ddx5 to tether  
32 *PAM-1* SE to its inter-chromosomal targets *Timp2* and *Vim* to activate the gene expression.  
33 Lastly, we show that *PAM-1* expression is increased in aging SCs, which leads to enhanced  
34 inter-chromosomal interaction and target genes up-regulation. Altogether, our findings  
35 identify *PAM-1* as a previously unknown lncRNA that regulates both SC activation and aging  
36 through its *trans* gene regulatory activity.

## 37 **Introduction**

38 Skeletal muscle tissue homeostasis and regeneration relies on muscle stem cells, also known  
39 as muscle satellite cells (SCs). These cells reside in a niche between the muscle fiber  
40 sarcolemma and the basal lamina surrounding the myofiber and are uniquely marked by  
41 transcription factor paired box 7 (Pax7). SCs normally lie in a quiescent state, upon activation  
42 by injury and disease, the cells quickly activate and express the master myogenic regulator,  
43 MyoD, then re-enter cell cycle and proliferate as myoblasts, subsequently differentiate and  
44 fuse to form myotubes (1, 2). A subset of SCs undergo self-renewal and return to quiescence,  
45 thus restoring the stem cell pool. Deregulated SC activity contributes to the development of  
46 many muscle associated diseases. For example, sarcopenia, a highly prevalent elderly  
47 disorder condition characterized by declined muscle mass and deficient muscle strength and  
48 function, is linked to a progressive reduction in the regenerative capacity of the SCs. It is thus  
49 imperative to understand the way SCs contribute to muscle regeneration, and their potential  
50 to cell-based therapies. At cellular level, every phase of SC activity is tightly orchestrated by  
51 many molecules and signalling pathways both intrinsically from the cell and extrinsically  
52 from the niche; the elucidation of factors and molecular regulatory mechanisms governing  
53 SC function thus is of extreme importance, being the first step toward successful use of these  
54 cells in therapeutic strategies for muscle diseases.

55

56 It has become increasingly clear that long non-coding RNAs (lncRNAs) are important  
57 players regulating SC regenerative activates (3). For example, *SAM* promotes myoblast  
58 proliferation through stabilizing *Sugt1* to facilitate kinetochore assembly (4); *Linc-YY1*  
59 promotes myogenic differentiation and muscle regeneration through interaction with YY1 (5).  
60 In another example, we found that in myoblast cells master transcription factor MyoD  
61 induces the expression of lncRNAs from super enhancers (SEs), so called seRNAs, which in

62 turn regulate target gene expression in *cis* through interacting with hnRNPL (6). In fact, the  
63 functional synergism between enhancer generated eRNAs and their associated enhancer  
64 activity in regulating target promoter expression is well established. There are myriad of  
65 mechanisms that eRNAs or lncRNAs cooperate with protein, DNA or RNA partners to  
66 regulate transcription of target genes either in *cis* and in *trans*. For example, it is known that  
67 specific eRNA can interact with CBP or BRD4 within topologically associating domain  
68 (TAD) in a localized manner (7-9). Similarly, eRNA *Sphk1* evicts CTCF, that insulates  
69 between enhancer and promoter, thus activating proto-oncogene *SPHK1* expression in *cis*  
70 (10). Some eRNAs or lncRNAs, on the other hand, play a dual molecular function both in *cis*  
71 and in *trans*, for example, *lincRNA-p21* acts in *trans* by recruiting heterogenous nuclear  
72 ribonucleoprotein K (hnRNPK) to the target promoter (11). Interestingly, in a separate study,  
73 *lincRNA-p21* can also transcriptionally activate *Cdkn1a* in *cis* (12). Another well  
74 demonstrated example of *trans* acting eRNA is *FIRRE*, that interacts with hnRNPU via a  
75 conserved RRD nuclear localization during hematopoiesis (13-15). Also, distal regulatory  
76 region of *MyoD* transcribed eRNA<sup>DRR</sup>eRNA that interacts with cohesin and transcriptionally  
77 activates *Myogenin* in *trans* (16). Altogether, these findings demonstrate the diversified  
78 modes of action of eRNAs or lncRNAs in regulating target genes, which needs to be more  
79 exhaustively investigated.

80

81 Here in this study, we identify *PAM-1*, an seRNA that regulates SC activation. Expression of  
82 *PAM-1* is evidently upregulated during SC activation; consistently, knockdown of *PAM-1* *in*  
83 *vitro* hindered SC activation. High throughput identification of *PAM-1* interactome reveals  
84 that it regulates Tissue inhibitor of metalloproteinases 2 (*Timp2*) locus in *trans* through  
85 binding and recruiting Ddx5 protein; loss of *PAM-1* or Ddx5 results in reduction of  
86 chromatin interaction between *PAM-1* SE and *Timp2* locus. Furthermore, *PAM-1* SE activity

87 and chromatin connectivity with *Timp2* is elevated in aging SCs; *in vivo* inhibition of the SE  
88 activity by JQ1 reduces *Timp2* expression. Altogether our findings have identified *PAM-1* as  
89 a seRNA regulator of SC activation through its *trans* regulation of *Timp2* synergistically with  
90 Ddx5 to promote SC activation.

91

## 92 **Results**

### 93 **lncRNAs profiling identifies *PAM-1* as a seRNA promoting SC activation**

94 To gain global insights into the catalogue of lncRNAs in adult MuSC activation, we  
95 performed RNA-seq on quiescent satellite cells (QSCs) which were *in situ* fixed in ice-cold  
96 0.5% paraformaldehyde before cell dissociation to preserve their quiescence, freshly isolated  
97 satellite cells (FISC), FISCs cultured and activated for 24 and 48 hours (ASC-24h and ASC-  
98 48h, respectively) (Fig 1A). lncRNAs expressed in each stage were identified and many  
99 lncRNAs were up- or down-regulated in ASC-24h or ASC-48h vs. QSCs (Fig 1B, and Suppl  
100 Table 1). 77 lncRNAs were up-regulated and 130 down-regulated in ASC-24h vs. FISC.  
101 (Suppl Figs 1A&B, Suppl Table 1). The above results suggested the dynamic expression of  
102 lncRNAs during SC activation. To further identify key lncRNAs that potentially play a role  
103 in SCs, we sought to identify Pax7 regulated lncRNAs by analyzing publicly available Pax7  
104 ChIP-seq data in myoblast (17). Among 207 differentially expressed lncRNAs in ASC-24h vs  
105 FISC, we found that Pax7 binding was enriched in promoter regions of 32 of them (Suppl  
106 Table 1); we thus named them as Pax7 associated muscle lncRNAs (*PAMs*). Among them,  
107 *PAM-1* represented as one of the most up-regulated lncRNA in ASC-24h vs. FISC, with no  
108 expression in FISC but reaching 12.7 FPKM in ASC-24h (Suppl Figs 1B&C), suggesting it  
109 possibly promotes SC activation/proliferation. Previously known as *Gm12603*, *PAM-1* is a  
110 lncRNA located on chromosome 4: in the intervening region of Interferon alpha (*Ifna*) family  
111 and Cyclin-dependent kinase 2 inhibitor (*Cdkn2a* and *Cdkn2b*) protein coding genes.  
112 *Gm12603* is also known as *Wincr1*, a Wnt activated lncRNA in mouse dermal fibroblast  
113 affecting extracellular matrix composition via collagen accumulation in dermal fibrosis (18).  
114 To dissect its function in SCs, we next cloned its sequence from C2C12 myoblast cells by  
115 Rapid Amplification of cDNA ends (RACE); it was 718bp long with three exons. More  
116 interestingly, we found that *PAM-1* is generated from a SE region defined using our

117 published H3K27ac ChIP-seq datasets (Fig 1C) (19). Concomitant with the expression  
118 pattern of *PAM-1*, high level of H3K27ac ChIP-seq signals were observed in ASC-24h but  
119 not in FISC (Fig. 1D). The above findings suggested that *PAM-1* may function as a seRNA to  
120 promote SC activation. Indeed, knockdown of *PAM-1* reduced the activation of SCs as  
121 revealed by the EdU assay (Fig. 1E). Overexpression of *PAM-1* in FISCs by transfection of a  
122 *PAM-1* expression plasmid resulted in 16.65% increase of Pax7 MyoD double positive ASCs,  
123 concomitant with reduction in number of Pax7+MyoD- QSCs by 16.65%, (Fig 1F). Similar  
124 phenomena were also observed in SCs associated with isolated single muscle fibers;  
125 overexpressing the *PAM-1* plasmid led to a 26.66% increase of Pax7+MyoD+ cells (Fig 1G).  
126 Taken together, these findings suggest *PAM-1* is a potential seRNA that promotes activation  
127 of SCs.

128

### 129 ***PAM-1* interacts with inter-chromosomal loci to modulate target expression**

130 To further elucidate the regulatory mechanism of *PAM-1* in SC activation, we sought to  
131 identify the subcellular localization pattern of *PAM-1* as lncRNA function is largely  
132 determined by its cellular localization (20, 21) and seRNAs are known to be localized in both  
133 nucleus and cytoplasm of muscle cells (6). Cellular fractionation was performed using C2C12  
134 myoblasts and *PAM-1* was found to localize largely in nuclear fraction (70.21%); as controls,  
135 lncRNAs *Xist* and *Malat1* were predominately nuclear localized (93.61% and 87.37%  
136 respectively) while *Gapdh* mRNAs were enriched in the cytoplasm (89.66%) (Fig 2A). The  
137 above finding was further validated by RNA Fluorescence in situ hybridization (FISH) using  
138 *PAM-1* anti-sense probe, which also revealed *PAM-1* transcript was predominantly enriched  
139 in the nucleus of ASCs (Fig 2B). Lastly, Subcellular localization of *PAM-1* was also  
140 confirmed using sucrose gradient centrifugation on C2C12 myoblast lysate which separated  
141 protein complex based on their size. Using cohesin loading factor NIPBL as positive control

142 for nuclear fraction, we also found *PAM-1* mainly enriched in the nucleus of myoblasts (Fig  
143 2C). Taken together, our results showed *PAM-1* is a nuclear enriched seRNA.

144

145 To elucidate the functional mechanism of *PAM-1* as a nuclear seRNA, *PAM-1* seRNA and  
146 *PAM-1* SE interacting loci on the genome were identified respectively (Fig 2D). We first  
147 performed *PAM-1* Chromatin Isolation by RNA Purification (ChIRP-seq) in ASCs to identify  
148 its binding target loci. As a result, we found that *PAM-1* seRNA interacted with 178 DNA  
149 regions and associated with 1199 genes across the genome (Figs 2E&F, Suppl Fig 2A and  
150 Suppl Table 2). Strikingly, *PAM-1* dominantly associated with inter- but not intra-  
151 chromosomal regions (Fig 2F). Only 5 out of the 178 regions were found on chromosome 4  
152 and not adjacent to *PAM-1* gene locus (Suppl Table 2). The above findings suggested *PAM-1*  
153 seRNA may predominantly target gene loci in *trans*. Gene Ontology (GO) analysis on the  
154 above identified *PAM-1* ChIRP-seq targets revealed that they were enriched for actin  
155 filament organization and regulation of cell shape (Suppl Fig 2A). Next, we set out to  
156 identify *PAM-1* SE target genes by performing circular chromosome conformation capture  
157 (4C-seq) using *PAM-1* SE region as a bait to query genome-wide chromatin interactions.  
158 Among 929 interacting targets, 74% (687) were in *trans* while only 26% (242) were in *cis* on  
159 chromosome 4 (Figs 2G&H and Suppl Table 3).

160

161 By comparing the above targets from *PAM-1* seRNA ChIRP-seq and *PAM-1* SE 4C-seq data,  
162 we identified 11 common loci in both datasets; one of the loci was located on chromosome 4,  
163 33Mb downstream of *PAM-1* on chromosome 4, while others were all located in other  
164 chromosomes (Fig 2I), suggesting *PAM-1* and *PAM-1* SE may regulate genes in *trans*  
165 together. These 11 loci were associated with 152 genes, which were enriched for GO terms  
166 such as “adherens junction”, “anchoring junction”, in which *Timp2* and Vimentin (*Vim*)



167 genes were top ranked (Fig 2J&K). *Timp2* plays a dual role in mediating extracellular matrix  
168 by mediating matrix metalloproteinase (MMP) activation and inhibition via interaction with  
169 MMP-14 and MMP-2 (22). Overexpression of *Timp2* in C2C12 myoblast was known to  
170 delay myogenic differentiation and arrest C2C12 in Myod+Myog- state (23). *Vim* is an  
171 intermediate filament protein to modulate cell shape and motility in myoblast, which is also  
172 considered as a reliable marker for regenerating muscle tissue (24-27). The above findings  
173 raised an intriguing possibility that *PAM-1* seRNA and *PAM-1* SE interact with the inter-  
174 chromosomal target loci *Timp2* and *Vim* to activate their expression. Consistent with the  
175 notion, we found that knocking down *PAM-1* seRNA using siRNA oligo decreased the  
176 expression levels of *Timp2* and *Vim* in C2C12 myoblasts (Fig 3A); removing *PAM-1* SE  
177 region using CRISPR/cas9 yielded similar molecular phenotype (Fig 3D). To test the  
178 possibility that *PAM-1* functions to tether *PAM-1* SE to the target loci, we performed 3C  
179 qRT-PCR assay in C2C12 myoblasts; in line with the 4C-seq result, and *PAM-1* locus indeed  
180 displayed evident interaction with *Timp2* and *Vim* promoters; however, *PAM-1* siRNA oligo  
181 mediated knockdown significantly reduced the interaction by 41.42% & 58.72% for *Timp2*,  
182 and 25.77% & 32.18% for *Vim* (Fig 3B). Consistently, down-regulation of *PAM-1*  
183 expression also led to a reduction in H3K27ac signals at *Timp2* and *Vim* loci (Fig 3C).  
184 Furthermore, knockout of the 59bp flanking 5' of *PAM-1* transcript and the constituent  
185 enhancer of *PAM-1* SE region (Suppl Fig 2B) in C2C12 myoblast using CRISPR/Cas9 also  
186 led to reduction in the chromatin interaction between *PAM-1* SE with *Timp2* and *Vim*, and  
187 reduced expression of *Timp2* and *Vim* and associated H3K27ac signals (Figs 3C&F).  
188 Altogether, our results demonstrate that *PAM-1* seRNA and *PAM-1* SE can indeed interact  
189 with inter-chromosomal target loci *Timp2* and *Vim* to modulate their expression.

190

191 ***PAM-1* regulates inter-chromosomal targets via associating with Ddx5**

192 To further explore molecular mechanism on how *PAM-1* regulates inter-chromosomal targets  
193 *Timp2* and *Vim*, we performed RNA-pulldown followed by mass spectrometry (MS) to  
194 identify its protein interactome (Fig 4A&B). Biotinylated sense probe of *PAM-1* was used in  
195 the RNA pull down *in vitro*, while biotinylated anti-sense probe was used as negative control  
196 for non-specific protein binding. Among 134 potential protein partners retrieved by the sense  
197 probe with at least 5 unique peptide count, two known RNA binding proteins (RBPs),  
198 DEAD-Box Helicase 5 (Ddx5) and DEAD-Box Helicase 17 (Ddx17) were highly ranked,  
199 which showed 22 and 14 unique peptide counts respectively with target protein size around  
200 70kDa (Fig 4B). These proteins are commonly found to bind together in multiple cell types to  
201 carry out a myriad of molecular functions such as transcription regulation, rRNA processing,  
202 mRNA decay and splicing (28). To validate the above result, we performed RNA-pulldown  
203 followed by Western blot. *PAM-1* seRNA but not GFP control transcripts retrieved an  
204 evident amount of Ddx5 and Ddx17 from C2C12 myoblast (Fig 4C). To test if Ddx5  
205 regulates target expression in cooperation with *PAM-1* seRNA, we first performed Ddx5  
206 ChIP-seq which revealed an evident binding of Ddx5 on *Timp2* and *Vim* loci (Fig 4D),  
207 suggesting *PAM-1*/Ddx5 are both tethered to the target loci. Consistent with their possible  
208 functional synergism, knockdown of Ddx5 in ASCs led to down-regulation of *Timp2* and *Vim*  
209 (Fig 4E). Furthermore, knockdown of Ddx5 in ASCs reduced the interaction between *PAM-1*  
210 SE and promoters of *Timp2* and *Vim* (Fig 4F), suggesting Ddx5 promotes the inter-  
211 chromosomal interaction together with *PAM-1* (29). Lastly, knockdown of *Ddx5* reduced the  
212 number of activated SCs as revealed by the EdU assay (Fig 4G). Taken together, our findings  
213 demonstrate *PAM-1* seRNA and Ddx5 function synergistically in orchestrating the inter-  
214 chromosomal interactions between the *PAM-1* SE with the two target loci, *Timp2* and *Vim*,  
215 consequently promoting transcriptional activity.

216

217 ***PAM-1* increase in aging SCs drives its target gene upregulation**

218 Lastly, to test the possible involvement of *PAM-1* in SC aging, we performed ChIP-qPCR in  
219 ASCs from mice of various ages (2, 16 or 24 months) and found the activity of *PAM-1* SE  
220 was indeed increased by 13.63% at 16 months, and reached a plateau (26.45%) at 20 months  
221 (Fig 5A). The expression of *Timp2* also showed an increase (781.36%) in ASCs from 20 vs  
222 2-month-old mice; but *Vim* expression remained unchanged (Fig 5B). Furthermore, the  
223 interaction between *PAM-1* locus and promoters of *Timp2* and *Vim* were found to increase by  
224 46.75% and 50.18% respectively in 20 vs 2-month-old ASC (Fig 5C). Altogether, the above  
225 data suggest that *PAM-1* SE activity is elevated in aging SCs and it is accompanied by the  
226 enhanced inter-chromosomal interaction between *PAM-1* and target loci and upregulated  
227 target expression. Our result suggested *Timp2* chromatin activity was increased during aging,  
228 and potentially mediated by *PAM-1*. Lastly, to further confirm the synergistic function of  
229 *PAM-1* and *Ddx5* in increasing *Timp2* expression in aging SCs, we found that knockdown of  
230 *PAM-1* or *Ddx5* in ASC in 20- or 30- month but not 2-month-old mice led to down-regulation  
231 of *Timp2* in ASCs (Fig 5D). Recently we have reported the use of BET family of  
232 bromodomain protein binding inhibitor JQ1 to down-regulate enhancer activity in aging  
233 mouse muscle (30). Expectedly, *in vivo* JQ1 treatment in 10-month-old mice led to a down-  
234 regulation of *PAM-1* seRNA and *Timp2*, but interestingly not *Vim* (Fig 5E), reinforcing the  
235 notion that *PAM-1* SE activation causes *Timp2* upregulation during SC aging.

236

## 237 **Discussion**

238 Myogenesis is a complex process that relies on tightly regulated and finely tuned  
239 transcriptional regulatory mechanisms. Previous studies have discovered a myriad of  
240 lncRNAs that are dynamically regulated during myogenesis (31). Yet, their functional  
241 mechanisms in SCs remain largely unexplored. Here in this study we identified *PAM-1*, a  
242 seRNA that binds with Ddx5 protein to synergistically tether the SE to its inter-chromosomal  
243 target loci *Timp2* and *Vim*. Furthermore, we showed that deregulation of *PAM-1* in aging SCs  
244 drives the target gene deregulation (Fig 6).

245

246 Through transcriptomic profiling, *PAM-1* was identified as highly induced in activated SCs.  
247 Loss- and gain-of-function studies in SCs indeed pinpointed it as a promoting factor for SC  
248 activation. Its nuclear localization is consistent with its nature of being a seRNA. As part of  
249 the SE regulatory machinery, *PAM-1* and its residing SE together promote the expression of  
250 their target loci, *Timp2* and *Vim*, both encoding extracellular matrix proteins. Increased  
251 extracellular matrix (ECM) proteins expressions are essential to SC activation (32). The  
252 regulation of ECM composition was conventionally believed to be mediated by surrounding  
253 fibroblasts, fibro/adipogenic progenitors, myofibers and basal lamina. In addition to receiving  
254 signals from ECM, emerging evidence demonstrates SCs also contribute to ECM  
255 compositions through secretion of matrix metalloproteases and urokinase plasminogen  
256 activator (33, 34). For example, transcriptome profiling of freshly isolated SC revealed that  
257 cell adhesion and ECM genes, such as *Timp* and *integrin*, were differentially expressed when  
258 compared with freshly isolated SC from dystrophic mdx mice (35, 36). This correlation was  
259 further demonstrated by systemic delivery of MMP inhibitor, AM409, which impairs SC  
260 activation (35). Therefore, upregulation of ECM gene expression mediates the promoting  
261 function of *PAM-1* during SC activation. Furthermore, we showed that *PAM-1* upregulation

262 contributes to ECM increase in aging SCs. It is known that the regenerative potential of SCs  
263 declines during aging, which is concurrent with its fibrogenic conversion and muscle  
264 fibrosis (37). Our findings thus provide a potential way to partially restore ECM in aging  
265 SCs by down-regulating *PAM-1* expression. Recently, an integrated transcriptome analysis of  
266 aging human skeletal muscle revealed a group of differentially expressed lncRNAs, and  
267 overexpression of lncRNA *PRKG1-AS1* could increase cell viability and reduce apoptosis  
268 in human skeletal myoblast (38). In the future more efforts will be needed to elucidate the  
269 potential roles of lncRNAs in aging SCs.

270

271 Mechanistically, our data highlights the important role of *PAM-1* seRNA to regulate inter-  
272 chromosomal targets through tethering its residing SE to the target loci. eRNAs or seRNAs  
273 are commonly known to regulate enhancer-promoter interactions as an integrated component  
274 of SE activating machinery (6); it is believed that *cis* regulation of the target loci through  
275 intra-chromosomal interactions is a more prevalent mode compared to *trans* regulation via  
276 inter-chromosomal interactions (39). However, *trans* activating eRNAs do exist to translocate  
277 to distal chromosomal regions beyond its neighboring loci. For example, *MyoD* distal  
278 enhancer generates <sup>DRR</sup>eRNA that transcriptionally regulate *Myogenin* expression in *trans* via  
279 cohesin recruitment (16). Similarly, in human prostate cancer, an adjacent eRNA of kallikrein  
280 related peptidase 3 (*KLK3*) can regulate target genes expression in *trans* (40). Our findings  
281 from integrating ChIRP-seq and 4C-seq demonstrate that *PAM-1* mainly acts in *trans* to exert  
282 its regulatory function in SCs; thus provide additional evidence to support the *trans*  
283 regulatory mechanism by eRNAs.

284

285 Another important discovery from our study stems from the identification of a direct physical  
286 interaction between *PAM-1* and Ddx5. Ddx5 and *PAM-1* synergistically facilitate the SE-

287 target interaction; knockdown of *Ddx5* impaired the interaction. Although classically known  
288 as a RNA helicase controlling mRNA splicing, recent studies demonstrated Ddx5 interacts  
289 with a myriad of lncRNAs, and uses the lncRNAs as a scaffold to bring in specific  
290 transcriptional machinery or chromatin architectural protein in context dependent manner  
291 (28). It was also demonstrated that Ddx5 interacts with lncRNA *mrhl* to mediate cell  
292 proliferation in mouse spermatogonial cells (41). Ddx5 and Ddx17 (p68 and p72) bind with  
293 lncRNA *SRA* in regulating skeletal muscle differentiation (42). With foundation laid by these  
294 studies, we further demonstrated the functional role of Ddx5 to mediate chromatin  
295 interactions via its interaction with *PAM-1*, underscoring the prevalence of lncRNAs and  
296 RNA helicases interaction and also broadening the mechanisms through which lncRNAs  
297 regulate gene expression.  
298

299 **Materials and Method**

300 **Mice.**

301 Tg:Pax7-nGFP mouse strain (43) was kindly provided by Dr. Shahragim Tajbakhsh. All  
302 animal handling procedures and protocols were approved by the Animal Experimentation  
303 Ethics Committee (AEEC) at the Chinese University of Hong Kong.

304

305 **JQ1 treatment.**

306 JQ1 treatment was performed as described previously (30). C57/BL6 mice were caged in  
307 groups of five and maintained at controlled temperature ( $20\pm 1^\circ$ ), humidity ( $55\pm 10\%$ ), and  
308 illumination with 12hours light/ 12hours dark cycle. Food and water were provided *ad*  
309 *libitum*. All procedures involving animal care or treatments were approved by the Animal  
310 Ethics Committee (AEEC) at Chinese University of Hong Kong (CUHK) on the protection of  
311 animals used for scientific purposes. To investigate the effect of JQ1 on aging skeletal muscle,  
312 daily intraperitoneal injection of JQ1 at 50mg/kg was performed on 10-month-old mouse for  
313 14 days (30), with DMSO as control. Then TA muscle tissues were extracted from mice, and  
314 MuSCs were isolated from mouse skeletal muscle by fluorescence-activated cell sorting  
315 (FACS) using BD FACSAria Fusion cell sorter (BD Biosciences) with cell surface marker  
316 Sca1<sup>-</sup>/CD31<sup>-</sup>/CD45<sup>-</sup>/Vcam<sup>+</sup> (44).

317

318 **Cells.**

319 Mouse C2C12 myoblast cell (CRL-1772) was obtained from American Type Culture  
320 Collection (ATCC) and cultured in DMEM medium with 10% fetal bovine serum, 1%  
321 penicillin/ streptomycin at 37°C in 5% CO<sub>2</sub>. Oligonucleoties of siRNA against mouse *PAM-1*  
322 and scrambled control were obtained from Ribobio Technologies (Guangzhou, China).  
323 siRNAs were transfected at 100nM into C2C12 using Lipofectamine 2000 (Life

324 Technologies). The sequences of oligonucleotides using for siRNA knockdown were listed in  
325 Supplementary Table 4.

326

### 327 **Satellite cell isolation and culture.**

328 Hindlimb skeletal muscles from Tg:Pax7-nGFP mice were dissected and minced, followed  
329 by digestion with Collagenase II (LS004177, Worthington, 1000 units/mL) for 90 min at  
330 37°C in water bath shaker. Digested muscles were then washed in washing medium (Ham's  
331 F-10 medium (N6635, Sigma) containing 10% heat inactivated horse serum (Gibco,  
332 26050088) with 1% penicillin/ streptomycin, followed by incubating in digestion medium  
333 with Collagenase II (100 units/mL) and Dispase (1.1 unit/mL, Gibco, 17105-041) for  
334 additional 30 min. Suspensions were then passed through 20G syringe needle to release  
335 myofiber-associated SCs. Mononuclear cells were filtered with a 40µm cell strainer, followed  
336 by cell sorting using BD FACSAria Fusion Cell Sorter (BD Biosciences). BD FACSDiva  
337 (BD Biosciences, version 8.0.1) software was used to manage machine startup, data  
338 acquisition and analysis of flow cytometry data. Culture dish were coated with poly-D-lysine  
339 (Sigma, P0899) and Matrigel (BD Bioscience, 356234). FACS isolated SCs were seeded in  
340 coated culture dish and cultured in Ham's F10 medium with 10% heat inactivated horse  
341 serum, 5ng/mL FGF-Basic (AA 10-155) (Gibco, PHG0026), or cultured in differentiation  
342 medium (Ham's F10 medium with 2% horse serum and 1% penicillin/ streptomycin).

343

### 344 **EdU incorporation assay.**

345 EdU incorporation assay was performed as described previously (4). EdU was added to  
346 cultured MuSCs for 4 hours, followed by fixation in 4% paraformaldehyde (PFA) for 15 min  
347 and stained according to the EdU staining protocols provided by manufacturer (Thermo  
348 Fisher Scientific, C10086)



349

350 **Single myofibers isolation and culture.**

351 Extensor digitorum longus (EDL) muscles were dissected and digested in collagenase II  
352 (800 units/mL) in DMEM medium at 37°C for 75 min. Single myofibers were released by  
353 gentle trituration with Ham's F-10 medium with heat inactivated horse serum and 1%  
354 penicillin/ streptomycin, then cultured in this medium for the follow up experiments.

355

356 **Genomic editing by CRISPR-Cas9 in C2C12 cells.**

357 To delete *PAM-1* exon1, target-specific guide RNAs (gRNAs) were designed using CRISPR  
358 design tool (<http://crispr.mit.edu>), followed by cloning into BbsI digested px330 plasmid  
359 (Addgene, 42230). To perform genomic deletion, a pair of gRNAs containing plasmids were  
360 co-transfected into C2C12 cells with screening plasmid pSIREN-RetroQ (Clontech) using  
361 Lipotectamine 2000. Cells were selected with 2.5µg of puromycin for 3 days at 48 hours  
362 post-transfection. Cells were diluted to 1 cell per well in 96 well plate. Individual colonies  
363 were PCR validated. Sequences of gRNAs and genotyping primers were listed in  
364 Supplementary Table 4.

365

366 **Plasmids.**

367 Full length cDNA of *Gm12603* (*PAM-1*) was cloned into pcDNA3.1 vector using HindIII and  
368 KpnI restriction enzymes digestion site. Primer sequences were listed in Supplementary  
369 Table 4.

370

371 **qRT-PCR.**

372 RNAs were extracted using Trizol (Life Technologies), followed by reverse transcription  
373 using SuperScript III Reverse Transcriptase (Life Technologies). PCRs were performed with

374 SYBR green (Life Technologies) using 1 $\mu$ L of immunoprecipitated DNA as template. PCR  
375 products were analyzed by LC480 II system (Roche). Primers used are listed in  
376 Supplementary Table 4.

377

### 378 **RNA pulldown.**

379 RNA pulldown was performed as described previously (4). *PAM-1* DNA constructs were first  
380 linearized by single restriction enzyme digestion (NotI and XhoI for antisense and sense  
381 transcription respectively). Biotinylated transcripts were generated by these digested  
382 constructs by *in vitro* transcription using Biotin RNA labeling Mix (Roche) and MAXIscript  
383 T7/T3 *In Vitro* Transcription Kit (Ambion). Transcribed RNAs were denatured at 90°C for 2  
384 minutes, then cooling on ice for 5 minutes, followed by addition of RNA structure buffer  
385 (Ambion) and refolding at room temperature for 20 minutes. Nuclear proteins from C2C12  
386 cells were collected by resuspending cell pellet in nuclear isolation buffer (40mM Tris-HCl  
387 pH 7.5, 1.28M sucrose, 20mM MgCl<sub>2</sub>, 4% Triton X-100 and 1x protease inhibitor). Nuclei  
388 were collected by centrifugation at 3,000g and 4°C for 10 minutes. Supernatant was removed,  
389 and nuclear pellet was resuspended in 1mL RIP buffer (25mM Tris-HCl pH 7.4, 150mM KCl,  
390 0.5mM DTT, 0.5% NP-40, 1mM PMSF, 1x RNase inhibitor and 1x protease inhibitor),  
391 followed by homogenization for 10 cycles (15seconds on/off) using Ika homogenizer (Ika-  
392 Werk Instruments, Cincinnati). Nuclear envelopes and debris were removed by centrifugation  
393 at 16,200g for 10 minutes. For RNA pulldown assay, 1mg of nuclear extracts were incubated  
394 with 3 $\mu$ g of refolded RNA on rotator at room temperature for 1 hour. 30 $\mu$ L of prewashed  
395 Dynabeads M-280 Streptavidin were added to each reaction with incubate on rotator at room  
396 temperature for additional 1 hour. Streptavidin beads were collected using a magnetic rack,  
397 and beads were washed with 1mL RIP buffer for 5 times. Proteins were eluted by adding  
398 Western blot loading buffer and incubated at 95°C for 5 minutes, followed by removal of

399 beads using magnetic rack. RNA pulldown samples were analyzed by SDS-PAGE followed  
400 by silver staining and LC-MS/MS with Q Exactive and Easy-nLC 1000 system (Thermo  
401 Fisher). Peptides were identified using MASCOT.

402

### 403 **RNA Fluorescence in situ hybridization (FISH).**

404 RNA FISH was performed as described previously (45). Cells were fixed with 4%  
405 formaldehyde in PBS for 15 minutes at room temperature, followed by permeabilization with  
406 0.5% Triton X-100, 2mM VRC (NEB) on ice, and two times 2x SSC wash for 10 minutes  
407 each. Probes were first amplified with PCR using *PAM-1* expression plasmid in RNA  
408 pulldown experiment. PCR products were then precipitated by ethanol, nick-translated and  
409 labelled with Green d-UTP (Abbott) and nick translation kit (Abbott). For each FISH  
410 experiment, 200µg of probe and 20µg of yeast tRNA were lyophilized and redissolved in  
411 10µL formamide (Ambion), followed by denaturation at 100°C for 10 minutes and chilled  
412 immediately on ice. Denatured probes were mixed with hybridization buffer at 1:1 ratio. 20  
413 µL of hybridization mix was added onto fixed cells, followed by putting coverslip on it and  
414 incubated at 37°C for 16 hours in a humidified chamber. Cells were then washed twice in 2x  
415 SSC, 50% formamide; thrice in 2x SSC; and once in 1x SSC for 5 minutes each in 42°C.  
416 Cells were mounted by coverslip with ProLong Gold Antifade Reagent with DAPI  
417 (Invitrogen). Fluorescence images were taken in Olympus microscope FV10000 and FV10-  
418 ASW software (version 01.07.02.02, Olympus).

419

### 420 **Cellular fractionation.**

421 Cellular fractionation was performed as described previously (45). C2C12 cell pellet from  
422  $1 \times 10^6$  cells was lysed with lysis buffer (140mM NaCl, 50mM Tris-HCl pH 8.0, 1.5mM  
423 MgCl<sub>2</sub>, 0.5% NP-40, and 2mM Vanadyl Ribonucleoside Complex) for 5 minutes at 4°C,

424 followed by centrifugation at 4°C 300g for 2 minutes. The supernatant after centrifugation  
425 was considered as cytoplasmic fraction and stored in -20°C for storage, while the pellet was  
426 resuspended in 175µL resuspension buffer (500mM NaCl, 50mM Tris HCl pH 8.0, 1.5mM  
427 MgCl<sub>2</sub>, 0.5% NP-40, 2mM Vanadyl Ribonucleoside Complex) and incubate at 4°C for 5  
428 minutes. Nuclear-insoluble fraction in the resuspended pellet was removed by centrifugation  
429 at 4°C and 16000g for 2 minutes. RNA was extracted from cytoplasmic and nuclear soluble  
430 fraction by Trizol (Life Technologies).

431

#### 432 **Sucrose gradient.**

433 Sucrose gradient was performed as described previously (46). C2C12 cells were lysed in cell  
434 lysis buffer (50mM Tris-HCl pH 7.6, 1mM EDTA, 1% Triton X-100, 10% glycerol, 1mM  
435 DTT, 1mM PMSF, 1x RNase inhibitor and 1x protease inhibitor). 500µL of whole cell lysate  
436 was added to 13.5mL of 10-30% sucrose gradient, followed by centrifugation at 38000 RPM  
437 at 4°C for 16 hours. The centrifuged lysate was fractionated in 500µL portion. To avoid  
438 cross-contamination, only odd-numbered fractions were obtained. Protein samples were  
439 resolved in SDS-PAGE, followed by western blotting. RNA samples were subjected to RT-  
440 PCR of *PAM-1* and *I8S*, followed by 2% agarose gel electrophoresis.

441

#### 442 **Chromatin Immunoprecipitation using sequencing (ChIP-seq).**

443 ChIP assays were performed as previously described (47). C2C12 cells were crosslinked with  
444 1% formaldehyde at room temperature for 10 minutes, followed by quenching with 0.125M  
445 glycine for 10 minutes. Chromatin was fragmented using S220 sonicator (Covaris), followed  
446 by incubation with 5µg of antibodies and 50µL Dynabeads Protein G magnetic beads (Life  
447 Technologies) at 4°C on rotator for overnight. Anti-histone H3-K27 acetylation (Abcam,  
448 ab4729), anti Ddx5 (Abcam, ab21696) and normal rabbit IgG (Santa Cruz Biotechnology, sc-

449 2027) were used in ChIP assay. Beads were washed with 1mL RIPA buffer for 5 times,  
450 followed by decrosslinking at 65°C for 16 hours and DNA extraction with phenol/chloroform.  
451 Immunoprecipitated DNA was resuspended in 50µL of water. 200ng of immunoprecipitated  
452 DNA was used as starting material for NEBNext® Ultra II DNA Library Preparation kit for  
453 Illumina (NEB) according to manufacturer's guideline. DNA libraries were sequenced in  
454 Illumina NextSeq 550 platform.

455

#### 456 **Chromatin Isolation by RNA Purification using sequencing (ChIRP-seq).**

457 Biotin labelled probes targeting *PAM-1* lncRNA were designed by ChIRP Designer (LGC  
458 Biosearch Technologies) and listed in Supplementary Table 4. Cells were rinsed in PBS,  
459 trypsinized, washed once with complete DMEM followed by resuspension in PBS. 10 million  
460 of ASCs were collected per ChIRP experiment for separated odd and even probe pools. Cell  
461 pellets were cross-linked with 1% Glutaraldehyde in 40mL PBS on rotator for 10 minutes at  
462 room temperature, followed by quenching the cross-linking reaction with 2mL 1.25M  
463 Glycine for 5 minutes and resuspend in 1mL chilled PBS. Cell pellets were collected at  
464 2000RCF for 5 minutes at 4 °C, followed by removing PBS, snap frozen with liquid nitrogen  
465 and stored at -80°C. Cell pellets were lysed and sonicated according to our standard ChIP-seq  
466 protocol (47), then aliquoted into two 1mL samples. Before ChIRP experiment, DNA were  
467 extracted for quality control with size ranging from 100-500bp. For ChIRP experiment, 10µL  
468 of lysate were saved for DNA input. 1mL of sonicated lysate was mixed with 2mL of  
469 hybridization buffer (750mM NaCl, 50mM Tris-HCl pH7, 1mM EDTA, 1% SDS, 15%  
470 Formamide, 1x protease inhibitor and 1x RNase inhibitor). 100pmol of odd and even ChIRP  
471 probes were added separately to the hybridization mixture and incubate at 37°C for 4 hours  
472 with rotation. After the hybridization was completed, 100µL of streptavidin magnetic C1  
473 beads (Life Technologies, 65001) were washed thrice with hybridization buffer and added to

474 each ChIRP reaction for extra 30 minutes incubation at 37°C with rotation. After the  
475 hybridization completed, 1mL of wash buffer (2X SSC, 0.5% SDS and 1x protease inhibitor)  
476 was used to wash the beads for 5 times using magnetic stand. Input control and *PAM-I* bound  
477 DNA was eluted with ChIP elution buffer for each pair of ChIRP reactions using standard  
478 elution protocol as ChIP (47). For ChIRP-seq, DNA libraries were prepared as previous  
479 described in ChIP-seq protocol (47). Raw reads were uniquely mapped to mm9 reference  
480 genome using Bowtie2 (48). Peaks were called by using MACS2 (49).

481

#### 482 **4C-seq and 3C qRT-PCR.**

483 3C experiments were performed as previously described using restriction enzyme Bgl II to  
484 digest fixed chromatin (46). Primers for *PAM-I* bait region and target regions were listed in  
485 Supplementary Table 4. First round of restriction enzyme digestion in 4C-seq was the same  
486 as 3C qRT-PCR. 4C experiment was then continued with TatI restriction enzyme digestion,  
487 incubated overnight at 37°C and circularized using T4 DNA ligase. Gradient range of  
488 annealing temperature (55-65°C) were used to determine the optimum annealing temperature  
489 for inverse PCR. Primer sequences for inverse PCR were listed in Supplementary Table 4.  
490 PCR products were subject to standard sequencing library preparation as ChIP-seq and  
491 ChIRP-seq. Sequencing reads with 5' end matching the forward inverse PCR primer sequence  
492 were selected and trimmed, remaining sequences containing TatI sites were mapped to mm9  
493 assembly using Bowtie2 (48) and the interaction regions are identified by fourSig (50).

494

#### 495 **RNA-seq.**

496 Total RNAs were extracted using Trizol, followed by poly(A) selection (Ambion, 61006) and  
497 library preparation using NEBNext Ultra II RNA Library Preparation Kit (NEB). Barcoded  
498 libraries were pooled at 10pM and sequenced on Illumina HiSeq 1500 platform.

499

500 **Statistical analysis.**

501 Statistical analysis of experimental data was calculated by the Student's t-test, whereas \*

502  $P < 0.05$ , \*\*  $P < 0.01$ , and n.s. means not significant ( $P \geq 0.05$ ).

503

504 **Data availability.**

505 RNA-seq, H3K27ac ChIP-seq, *PAM-1* ChIRP-seq and *PAM-1* 4C-seq using in this study

506 have been deposited in Gene Expression Omnibus (GEO) database under the accession code

507 (GSE180073).

508

509

510 **Author contributions**

511 K.K.H.S., H.S. and H.W. designed the experiments; K.K.H.S., Y.H. and S.Z. conducted the  
512 experiments; L.H. provided support on CRISPR/cas9 experiments; Y.L. provided support on  
513 RNA pulldown experiments; X.C. provided support on cellular fractionation and RNA FISH;  
514 Y.Z. provided support on ChIRP-seq experiments; Y.D., J.Z. and J.Y. provided support on  
515 bioinformatics analysis; Y.H. analyzed the sequencing data; S.Z. contributed to *ex vivo*  
516 muscle fiber culture, M.H.S. provided resources for molecular experiments, K.K.H.S. and  
517 H.W. wrote the paper.

518

519 **Acknowledgements**

520 We thank Prof. Zhenguo Wu, Prof. Danny CY Leung and Prof. Tom HT Cheung for their  
521 kind suggestions on skeletal muscle satellite cells and epigenomics. This work was supported  
522 by General Research Funds (GRF) from the Research Grants Council (RGC) of the Hong  
523 Kong Special Administrative Region (14116918, 14120420, and 14120619 to H.S.;  
524 14115319, 14100018, 14100620, 14106117 and 14106521 to H.W.); the National Natural  
525 Science Foundation of China (NSFC) to H.W. (Project code: 31871304); Collaborative  
526 Research Fund (CRF) from RGC to H.W. (C6018-19GF); NSFC/RGC Joint Research  
527 Scheme to H.S. (Project code: N\_CUHK 413/18); Hong Kong Epigenomics Project (EpiHK)  
528 Fund to H.W. and H.S.; Area of Excellence Scheme (AoE) from RGC (Project number:  
529 AoE/M-402/20).

530

531



532 **Figure legend**

533 **Figure 1. lncRNAs profiling identifies *PAM-1* as a seRNA promoting SC activation. A.**

534 Transcriptomic and epigenomic discovery of seRNAs in quiescence SCs (QSCs), freshly  
535 isolated SCs (FISCs), or activated SCs (ASCs) *in vitro* cultured for 24, 48 and 72 hours  
536 respectively. All SCs were isolated from muscles of Tg:Pax7-nGFP mice. **B.** Differentially  
537 expressed genes (DEGs) were identified in ASCs versus QSCs. Yellow dots indicate  
538 differentially expressed lncRNAs. *PAM-1* was highly expressed in ASCs. **C.** Heatmap  
539 showing H3K27ac signal intensity on super-enhancers along SC activation. *PAM-1*  
540 associated SE was inactive in FISCs, but the activity peaked in ASCs after 24 hours of *in*  
541 *vitro* culture, followed by a reduction in SE activity. **D.** Genome browser tracks showing  
542 active histone mark H3K27ac on *PAM-1* locus. **E.** Knockdown of *PAM-1* expression *in vitro*  
543 in cultured ASCs for 48 hours with *in vitro* EdU incorporation assay. The percentage of  
544 EdU+ cells was quantified. **F-G.** Overexpression of *PAM-1* in FISCs or freshly isolated  
545 myofibers increased the percentage of Pax7+Myod+ cells 48 hours post-transfection. The  
546 percentage of double positive cells was quantified. (Data represent the mean  $\pm$  SD. P-value  
547 was calculated by two-tailed unpaired *t* test (\*P < 0.05). Scale bars: 100 $\mu$ m.)

548

549 **Figure 2. *PAM-1* is a nuclear-retained lncRNA, forming *cis* and *trans* chromosomal**

550 **interactions** **A.** Cellular fractionation of C2C12 cell line showed *PAM-1* was enriched in  
551 nucleus not cytosolic fraction. *Xist* and *Malat1* were positive control for nuclear fraction,  
552 *Gapdh* was positive control for cytosolic fraction. **B.** Fluorescence in situ Hybridization  
553 (FISH) using *PAM-1* antisense (AS) probe showed nuclear localization of *PAM-1*, sense  
554 probe (S) was used as negative control. Scale bar: 10 $\mu$ m **C.** Cellular fractionation using  
555 sucrose gradient ultracentrifugation showed *PAM-1* was co-localized in fractions containing  
556 nuclear protein Nipbl. **D.** Experimental workflow to discover *PAM-1* interactome and

557 regulatory targets. For details and controls, see Materials and Method. **E.** Pie chart showing  
558 distribution of *PAM-1* seRNA interacting chromatin across the genome in ChIRP-seq. **F.**  
559 Circos plot showing genes associated to *PAM-1* seRNA interacting chromatin, each line in  
560 the plot represents an interaction, line colors represent interchromosomal (purple) or  
561 intrachromosomal (green) interactions. Chromosome numbers were colored and arranged in  
562 clockwise direction. Top ranked genes were named in the figure. **G.** Pie chart showing  
563 distribution of *PAM-1* SE interacting chromatin across the genome in 4C-seq. **H.** Circos plot  
564 showing genes associated to *PAM-1* SE interacting chromatin, each line in the plot represents  
565 an interaction, line colors represent inter-chromosomal (purple) or intra-chromosomal (green)  
566 interactions. Chromosome numbers were colored and arranged in clockwise direction. Top  
567 ranked genes were named in the figure. **I.** Venn diagram showing overlapping loci between  
568 ChIRP-seq of *PAM-1* seRNA and 4C-seq of *PAM-1* SE. **J.** Table showing top ranked gene  
569 ontology (GO) terms of genes associated with overlapping loci from ChIRP-seq of *PAM-1*  
570 seRNA and 4C-seq of *PAM-1* SE. **K.** Genome browser tracks showing *Timp2* and *Vim* as  
571 examples of *PAM-1* inter-chromosomal targets.

572

573 **Figure 3. *PAM-1* regulates extracellular matrix associated genes *Timp2* and *Vim*.**

574 **A-C.** Knockdown of *PAM-1* expression with siRNA oligo treatment in C2C12 myoblast. **A.**  
575 Knockdown of *PAM-1* showed reduction in *Timp2* and *Vim* expression. **B.** Chromatin  
576 Conformation Capture assay (3C-qRT-PCR) with knockdown of *PAM-1* showed reduction in  
577 chromatin interaction between *PAM-1* SE with *Timp2* and *Vim*. **C.** Genome browser tracks  
578 showing knockdown of *PAM-1* led to mild reduction in H3K27ac signal intensity on *Timp2*  
579 and *Vim* loci. **D-F.** Knockout of *PAM-1* locus using CRISPR/cas9 approach in C2C12  
580 myoblast. **D.** Knockout of *PAM-1* showed significant reduction in *Timp2* and *Vim* expression.  
581 **E.** 3C-qRT-PCR with knockout of *PAM-1* showed reduction in chromatin interaction

582 between *PAM-1* SE with *Timp2* and *Vim*. **F.** Genome browser tracks showing knockout of  
583 *PAM-1* led to reduction in H3K27ac signal intensity on *Timp2* and *Vim* loci. Data information:  
584 Data represent the mean  $\pm$  SD. P-value was calculated by two-tailed unpaired *t* test (\*P <  
585 0.05, \*\*P < 0.01).

586

587 **Figure 4. *PAM-1* regulates inter-chromosomal targets via association with Ddx5. A.**

588 RNA pulldown using *PAM-1* sense or antisense (AS) experiment followed by SDS-PAGE.

589 AS was used as negative control. Red arrow indicates enrichment of a protein band at 70kDa

590 specifically found in pulldown using *PAM-1* sense probe. **B.** Mass spectrometry (MS) result

591 of the above band showing a list of potential protein binding partners of *PAM-1*. **C.** RNA

592 pulldown followed by Western blotting of the above identified two candidate protein partners

593 (Ddx5 and Ddx17) of *PAM-1* transcript. **D.** Ddx5 ChIP-seq in C2C12 myoblast showing

594 enrichment of Ddx5 on promoter of *Timp2* or *Vim*. **E.** Knockdown of *Ddx5* using siRNA

595 oligo in C2C12 myoblast showed reduction in expression of *Ddx5*, *Timp2* and *Vim* but not

596 *PAM-1*. **F.** 3C-qRT-PCR with siRNA oligo mediated *Ddx5* knockdown showed reduction in

597 chromatin interaction between *Timp2* or *Vim* promoter with *PAM-1* locus in the above cells.

598 **G.** Knockdown of *Ddx5* expression *in vitro* in cultured ASCs for 48 hours showed reduction

599 in EdU+ SCs. The percentage of EdU+ cells was quantified. Data information: Data represent

600 the mean  $\pm$  SD. P-value was calculated by two-tailed unpaired *t* test (\*P < 0.05, \*\*P < 0.01).

601 Scale bar: 100 $\mu$ m.

602

603 **Figure 5. *PAM-1* increase in aging SCs drives its target gene upregulation. A.** H3K27ac

604 ChIP qRT-PCR showing increase in enrichment on *PAM-1* SE in ASCs isolated from aging

605 (16 and 24 months) vs young (2 months) old mice. **B.** qRT-PCR showed up-regulation of

606 *PAM-1* and target genes *Timp2* but not *Vim* in ASCs from 20 vs. 2 month old mice. **C.** 3C-

607 qRT-PCR assay showed increase in interaction between *PAM-1* locus and *Timp2* or *Vim*  
608 promoter in the above aging ASCs. **D.** qRT-PCR showing the expression dynamics of *Timp2*  
609 in ASCs from 2, 20 and 30 months old mice. Knockdown of *PAM-1* or *Ddx5* using siRNA  
610 oligo in ASCs from 20 or 30 months old mice showed down-regulation of *Timp2*. **E.** *In vivo*  
611 treatment of JQ1, a Brd4 inhibitor, in 10 month old mice down-regulated expression of *PAM-*  
612 *1* and *Timp2* but not *Vim* in FISCs. Data information: Data represent the mean  $\pm$  SD. P-value  
613 was calculated by two-tailed unpaired *t* test (\*P < 0.05, \*\*P < 0.01).

614

615 **Figure 6. Schematic model showing functional role of seRNA *PAM-1* in SC activation**  
616 **and skeletal muscle aging.** *PAM-1* regulates SCs activation by binding with *Ddx5* to  
617 facilitate the chromatin interaction between *PAM-1* SE and target loci, *Timp2* and *Vim* during  
618 SC activation. In aging mice, the activity of *PAM-1* SE was elevated, thereby enhancing the  
619 transcription of *Timp2*, which potentially modulates extracellular matrix components in  
620 skeletal muscle.

621 **References:**

- 622 1. J. T. Rodgers *et al.*, mTORC1 controls the adaptive transition of quiescent stem cells  
623 from G0 to G(Alert). *Nature* **510**, 393-396 (2014).
- 624 2. Y. X. Wang, N. A. Dumont, M. A. Rudnicki, Muscle stem cells at a glance. *J Cell Sci*  
625 **127**, 4543-4548 (2014).
- 626 3. Y. Li, X. Chen, H. Sun, H. Wang, Long non-coding RNAs in the regulation of  
627 skeletal myogenesis and muscle diseases. *Cancer Lett* **417**, 58-64 (2018).
- 628 4. Y. Li *et al.*, Long noncoding RNA SAM promotes myoblast proliferation through  
629 stabilizing Sgt1 and facilitating kinetochore assembly. *Nat Commun* **11**, 2725 (2020).
- 630 5. L. Zhou *et al.*, Linc-YY1 promotes myogenic differentiation and muscle regeneration  
631 through an interaction with the transcription factor YY1. *Nat Commun* **6**, 10026  
632 (2015).
- 633 6. Y. Zhao *et al.*, MyoD induced enhancer RNA interacts with hnRNPL to activate  
634 target gene transcription during myogenic differentiation. *Nat Commun* **10**, 5787  
635 (2019).
- 636 7. H. Rahnamoun *et al.*, RNAs interact with BRD4 to promote enhanced chromatin  
637 engagement and transcription activation. *Nat Struct Mol Biol* **25**, 687-697 (2018).
- 638 8. D. A. Bose *et al.*, RNA Binding to CBP Stimulates Histone Acetylation and  
639 Transcription. *Cell* **168**, 135-149 e122 (2017).
- 640 9. N. V. N. Carullo *et al.*, Enhancer RNAs predict enhancer-gene regulatory links and  
641 are critical for enhancer function in neuronal systems. *Nucleic Acids Res* **48**, 9550-  
642 9570 (2020).
- 643 10. A. Blank-Giwojna, A. Postepska-Igielska, I. Grummt, lncRNA KHPS1 Activates a  
644 Poised Enhancer by Triplex-Dependent Recruitment of Epigenomic Regulators. *Cell*  
645 *Rep* **26**, 2904-2915 e2904 (2019).
- 646 11. M. Huarte *et al.*, A large intergenic noncoding RNA induced by p53 mediates global  
647 gene repression in the p53 response. *Cell* **142**, 409-419 (2010).
- 648 12. N. Dimitrova *et al.*, LincRNA-p21 activates p21 in cis to promote Polycomb target  
649 gene expression and to enforce the G1/S checkpoint. *Mol Cell* **54**, 777-790 (2014).
- 650 13. E. Hacisuleyman *et al.*, Topological organization of multichromosomal regions by the  
651 long intergenic noncoding RNA Firre. *Nat Struct Mol Biol* **21**, 198-206 (2014).
- 652 14. J. P. Lewandowski *et al.*, The Firre locus produces a trans-acting RNA molecule that  
653 functions in hematopoiesis. *Nat Commun* **10**, 5137 (2019).
- 654 15. E. Hacisuleyman, C. J. Shukla, C. L. Weiner, J. L. Rinn, Function and evolution of  
655 local repeats in the Firre locus. *Nat Commun* **7**, 11021 (2016).
- 656 16. P. F. Tsai *et al.*, A Muscle-Specific Enhancer RNA Mediates Cohesin Recruitment  
657 and Regulates Transcription In trans. *Mol Cell* **71**, 129-141 e128 (2018).
- 658 17. V. D. Soleimani *et al.*, Transcriptional dominance of Pax7 in adult myogenesis is due  
659 to high-affinity recognition of homeodomain motifs. *Dev Cell* **22**, 1208-1220 (2012).
- 660 18. N. K. Mullin *et al.*, Wnt/beta-catenin Signaling Pathway Regulates Specific lncRNAs  
661 That Impact Dermal Fibroblasts and Skin Fibrosis. *Front Genet* **8**, 183 (2017).
- 662 19. L. He *et al.*, In Vivo Study of Key Transcription Factors in Muscle Satellite Cells by  
663 CRISPR/Cas9/AAV9-sgRNA Mediated Genome Editing. *bioRxiv* 10.1101/797746,  
664 797746 (2020).
- 665 20. R. W. Yao, Y. Wang, L. L. Chen, Cellular functions of long noncoding RNAs. *Nat*  
666 *Cell Biol* **21**, 542-551 (2019).
- 667 21. Y. Huang *et al.*, Large scale RNA-binding proteins/LncRNAs interaction analysis to  
668 uncover lncRNA nuclear localization mechanisms. *Brief Bioinform*  
669 10.1093/bib/bbab195 (2021).

- 670 22. D. A. Young *et al.*, Expression of metalloproteinases and inhibitors in the  
671 differentiation of P19CL6 cells into cardiac myocytes. *Biochem Biophys Res Commun*  
672 **322**, 759-765 (2004).
- 673 23. G. Lluri, D. M. Jaworski, Regulation of TIMP-2, MT1-MMP, and MMP-2 expression  
674 during C2C12 differentiation. *Muscle Nerve* **32**, 492-499 (2005).
- 675 24. A. Bornemann, H. Schmalbruch, Desmin and vimentin in regenerating muscles.  
676 *Muscle Nerve* **15**, 14-20 (1992).
- 677 25. A. Gallanti *et al.*, Desmin and vimentin as markers of regeneration in muscle diseases.  
678 *Acta Neuropathol* **85**, 88-92 (1992).
- 679 26. F. Soglia *et al.*, Distribution and Expression of Vimentin and Desmin in Broiler  
680 Pectoralis major Affected by the Growth-Related Muscular Abnormalities. *Front*  
681 *Physiol* **10**, 1581 (2019).
- 682 27. T. Frohlich *et al.*, Progressive muscle proteome changes in a clinically relevant pig  
683 model of Duchenne muscular dystrophy. *Sci Rep* **6**, 33362 (2016).
- 684 28. G. Giraud, S. Terrone, C. F. Bourgeois, Functions of DEAD box RNA helicases  
685 DDX5 and DDX17 in chromatin organization and transcriptional regulation. *BMB*  
686 *Rep* **51**, 613-622 (2018).
- 687 29. H. Yao *et al.*, Mediation of CTCF transcriptional insulation by DEAD-box RNA-  
688 binding protein p68 and steroid receptor RNA activator SRA. *Genes Dev* **24**, 2543-  
689 2555 (2010).
- 690 30. J. Zhou *et al.*, Elevated H3K27ac in aged skeletal muscle leads to increase in  
691 extracellular matrix and fibrogenic conversion of muscle satellite cells. *Aging Cell* **18**,  
692 e12996 (2019).
- 693 31. E. Alessio *et al.*, Single cell analysis reveals the involvement of the long non-coding  
694 RNA Pvt1 in the modulation of muscle atrophy and mitochondrial network. *Nucleic*  
695 *Acids Res* **47**, 1653-1670 (2019).
- 696 32. W. Zhang, Y. Liu, H. Zhang, Extracellular matrix: an important regulator of cell  
697 functions and skeletal muscle development. *Cell Biosci* **11**, 65 (2021).
- 698 33. C. W. Guerin, P. C. Holland, Synthesis and secretion of matrix-degrading  
699 metalloproteases by human skeletal muscle satellite cells. *Dev Dyn* **202**, 91-99 (1995).
- 700 34. G. Fibbi *et al.*, Cell invasion is affected by differential expression of the urokinase  
701 plasminogen activator/urokinase plasminogen activator receptor system in muscle  
702 satellite cells from normal and dystrophic patients. *Lab Invest* **81**, 27-39 (2001).
- 703 35. G. Pallafacchina *et al.*, An adult tissue-specific stem cell in its niche: a gene profiling  
704 analysis of in vivo quiescent and activated muscle satellite cells. *Stem Cell Res* **4**, 77-  
705 91 (2010).
- 706 36. F. Relaix *et al.*, Perspectives on skeletal muscle stem cells. *Nat Commun* **12**, 692  
707 (2021).
- 708 37. H. Yamakawa, D. Kusumoto, H. Hashimoto, S. Yuasa, Stem Cell Aging in Skeletal  
709 Muscle Regeneration and Disease. *Int J Mol Sci* **21** (2020).
- 710 38. Y. Zheng, T. Liu, Q. Li, J. Li, Integrated analysis of long non-coding RNAs  
711 (lncRNAs) and mRNA expression profiles identifies lncRNA PRKG1-AS1 playing  
712 important roles in skeletal muscle aging. *Aging (Albany NY)* **13**, 15044-15060 (2021).
- 713 39. V. Sartorelli, S. M. Lauberth, Enhancer RNAs are an important regulatory layer of the  
714 epigenome. *Nat Struct Mol Biol* **27**, 521-528 (2020).
- 715 40. C. L. Hsieh *et al.*, Enhancer RNAs participate in androgen receptor-driven looping  
716 that selectively enhances gene activation. *Proc Natl Acad Sci U S A* **111**, 7319-7324  
717 (2014).

- 718 41. G. Arun, V. S. Akhade, S. Donakonda, M. R. Rao, mrhl RNA, a long noncoding RNA,  
719 negatively regulates Wnt signaling through its protein partner Ddx5/p68 in mouse  
720 spermatogonial cells. *Mol Cell Biol* **32**, 3140-3152 (2012).
- 721 42. G. Caretti *et al.*, The RNA helicases p68/p72 and the noncoding RNA SRA are  
722 coregulators of MyoD and skeletal muscle differentiation. *Dev Cell* **11**, 547-560  
723 (2006).
- 724 43. R. Sambasivan *et al.*, Distinct regulatory cascades govern extraocular and pharyngeal  
725 arch muscle progenitor cell fates. *Dev Cell* **16**, 810-821 (2009).
- 726 44. F. Chen *et al.*, YY1 regulates skeletal muscle regeneration through controlling  
727 metabolic reprogramming of satellite cells. *The EMBO journal* **38** (2019).
- 728 45. X. Chen *et al.*, Malat1 regulates myogenic differentiation and muscle regeneration  
729 through modulating MyoD transcriptional activity. *Cell Discov* **3**, 17002 (2017).
- 730 46. X. L. Peng *et al.*, MyoD- and FoxO3-mediated hotspot interaction orchestrates super-  
731 enhancer activity during myogenic differentiation. *Nucleic Acids Res* **45**, 8785-8805  
732 (2017).
- 733 47. K. K. So, X. L. Peng, H. Sun, H. Wang, Whole Genome Chromatin IP-Sequencing  
734 (ChIP-Seq) in Skeletal Muscle Cells. *Methods Mol Biol* **1668**, 15-25 (2017).
- 735 48. B. Langmead, S. L. Salzberg, Fast gapped-read alignment with Bowtie 2. *Nat*  
736 *Methods* **9**, 357-359 (2012).
- 737 49. Y. Zhang *et al.*, Model-based analysis of ChIP-Seq (MACS). *Genome Biol* **9**, R137  
738 (2008).
- 739 50. R. L. Williams, Jr. *et al.*, fourSig: a method for determining chromosomal interactions  
740 in 4C-Seq data. *Nucleic Acids Res* **42**, e68 (2014).
- 741

## Figure 1 So K.K.H. & Huang Y. et al.

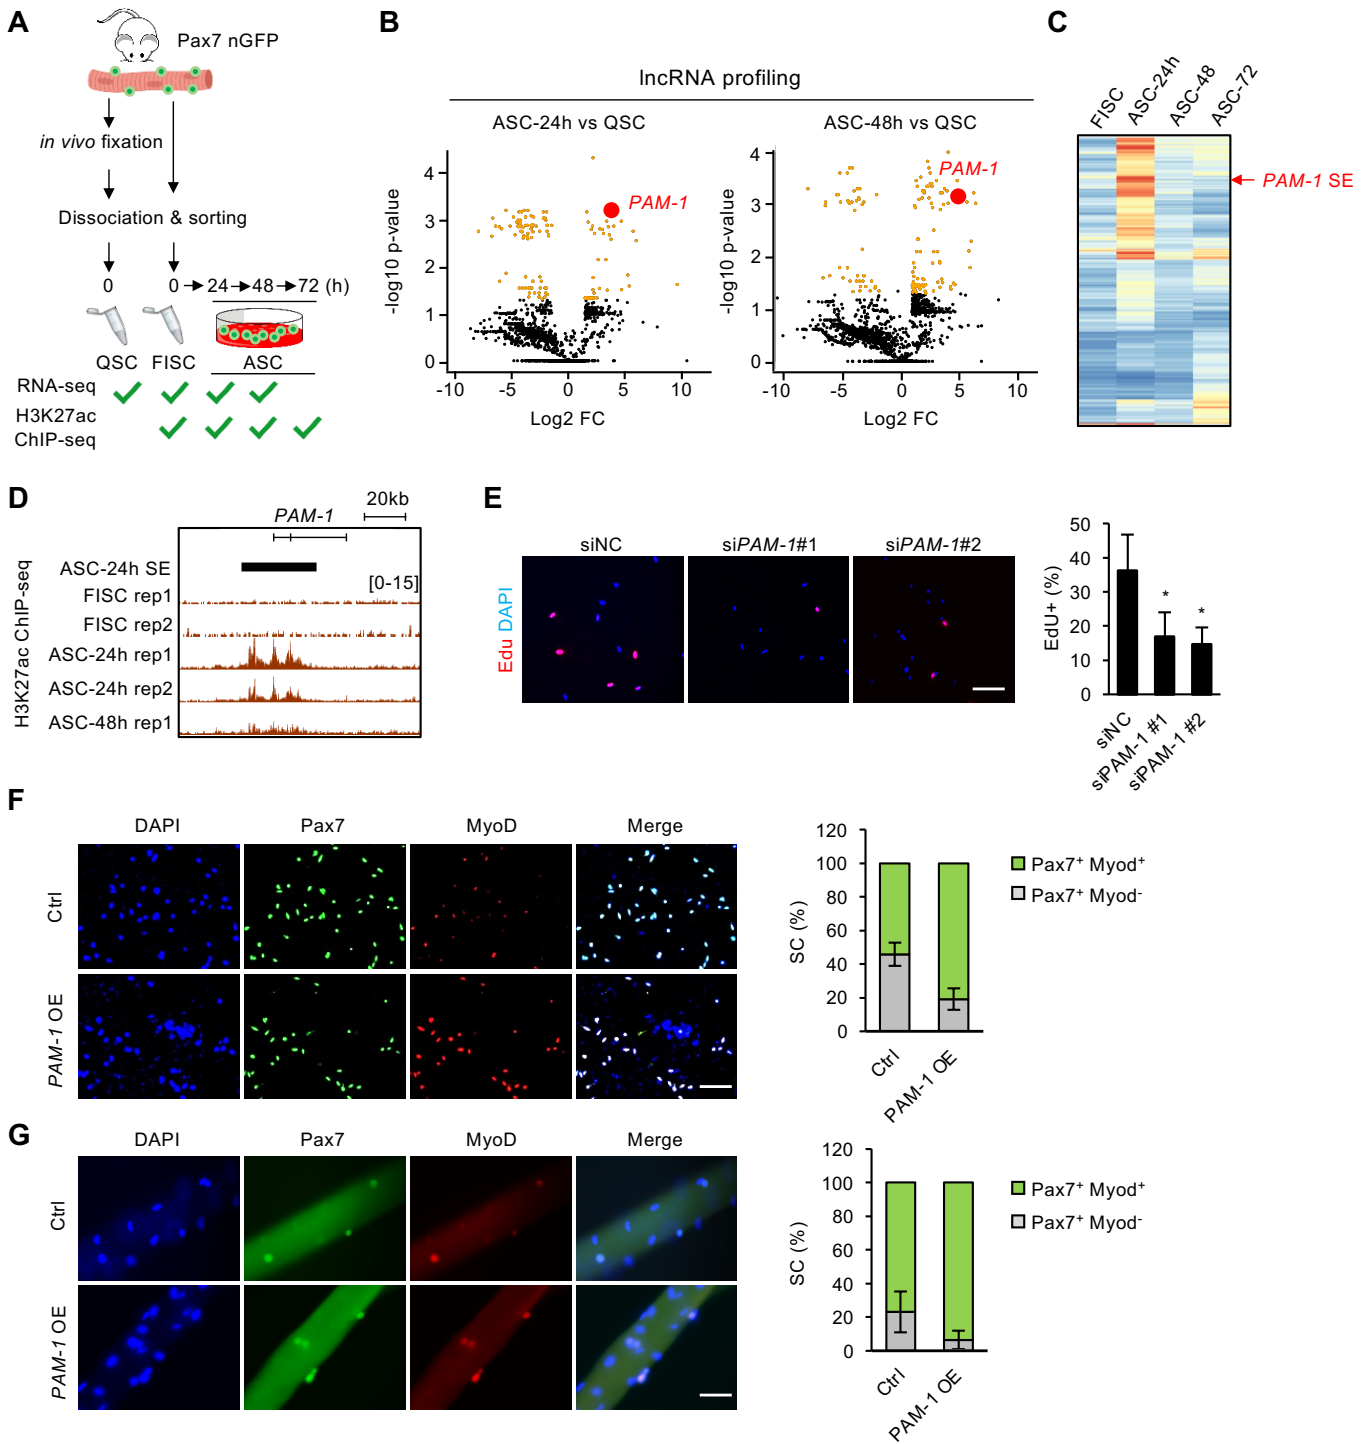



## Figure 2 So K.K.H. & Huang Y. et. al.

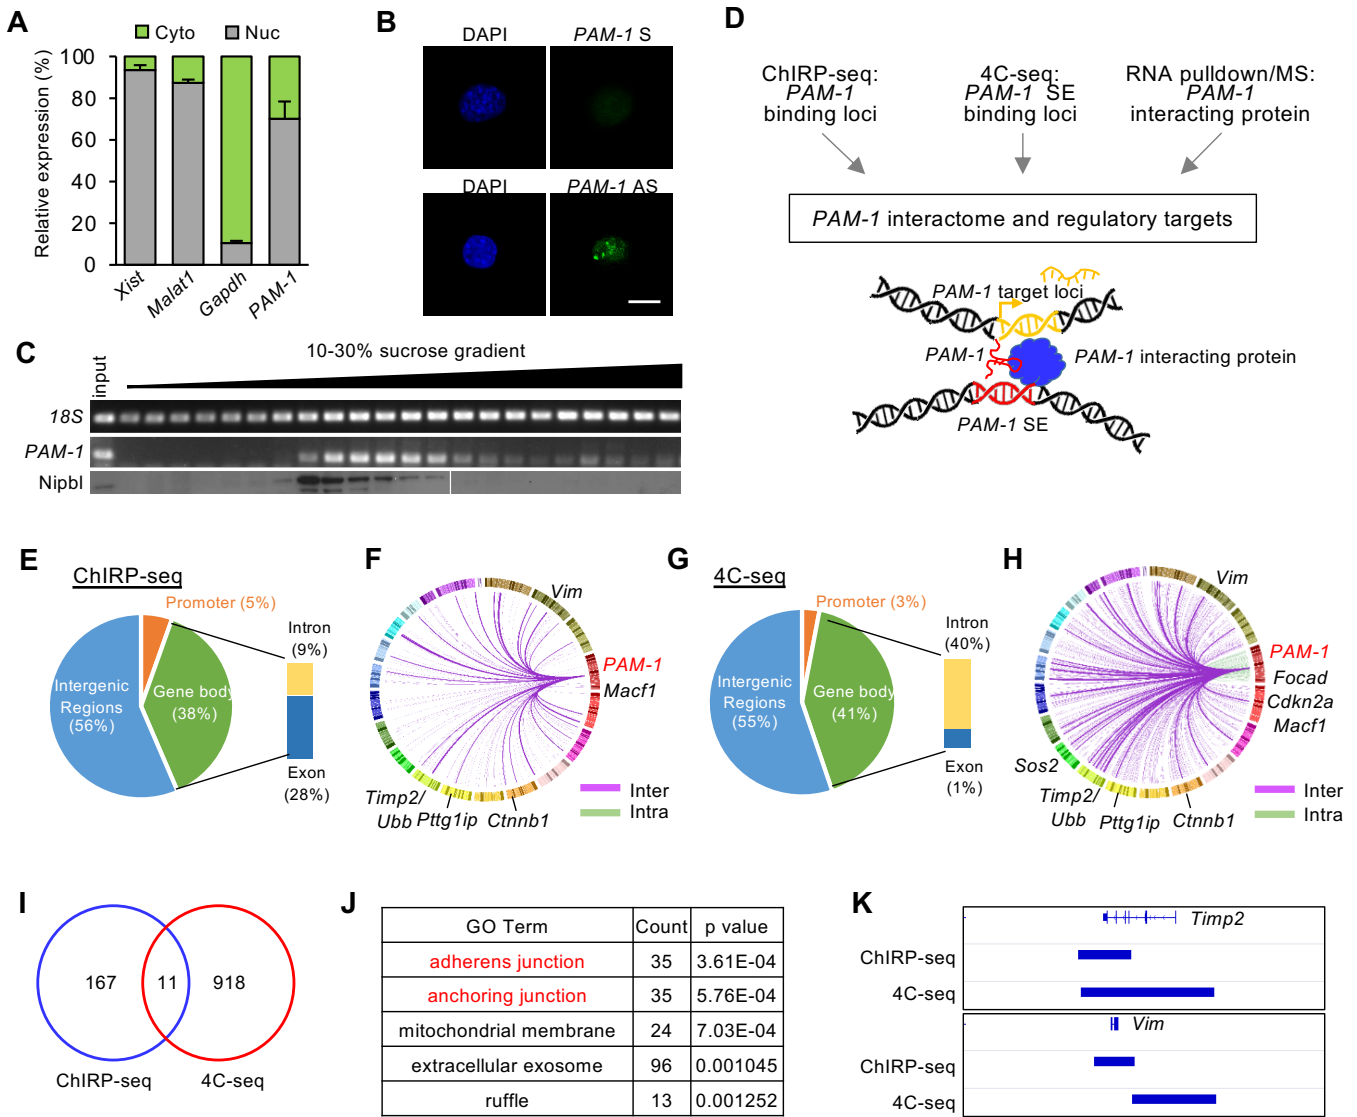

### Figure 3 So K.K.H. & Huang Y. et. al.

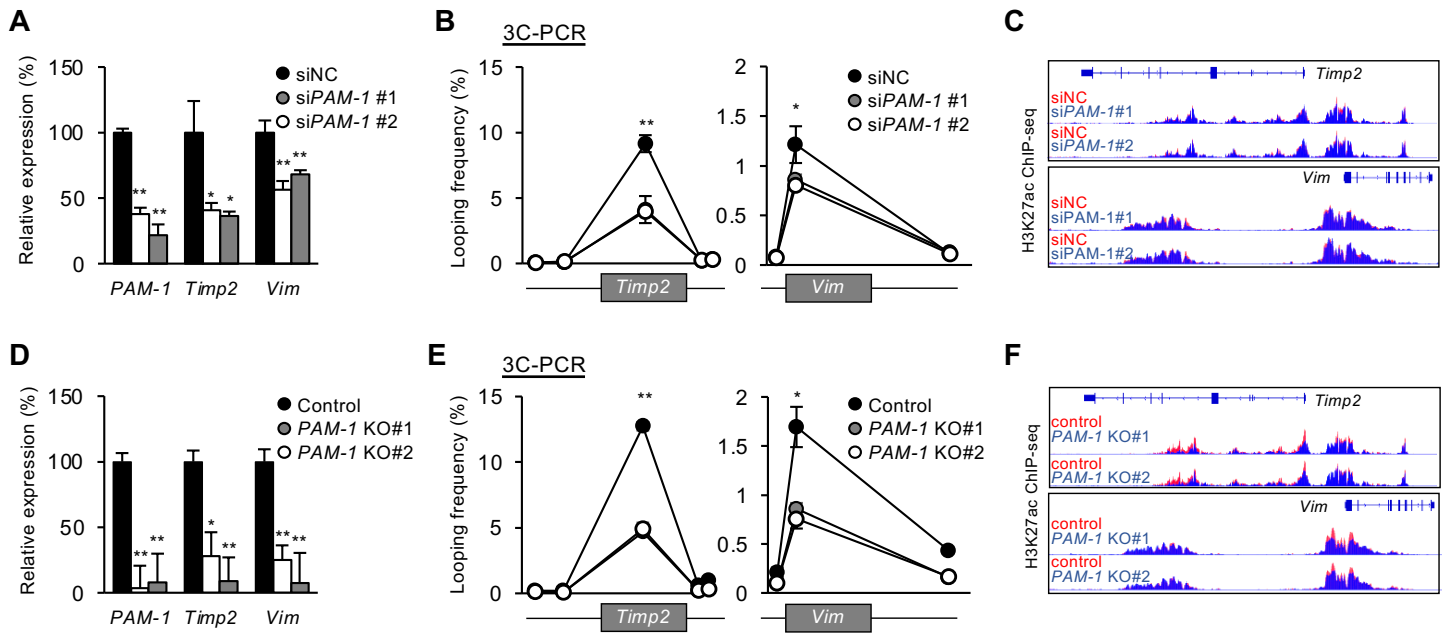

## Figure 4 So K.K.H. & Huang Y. et. al.

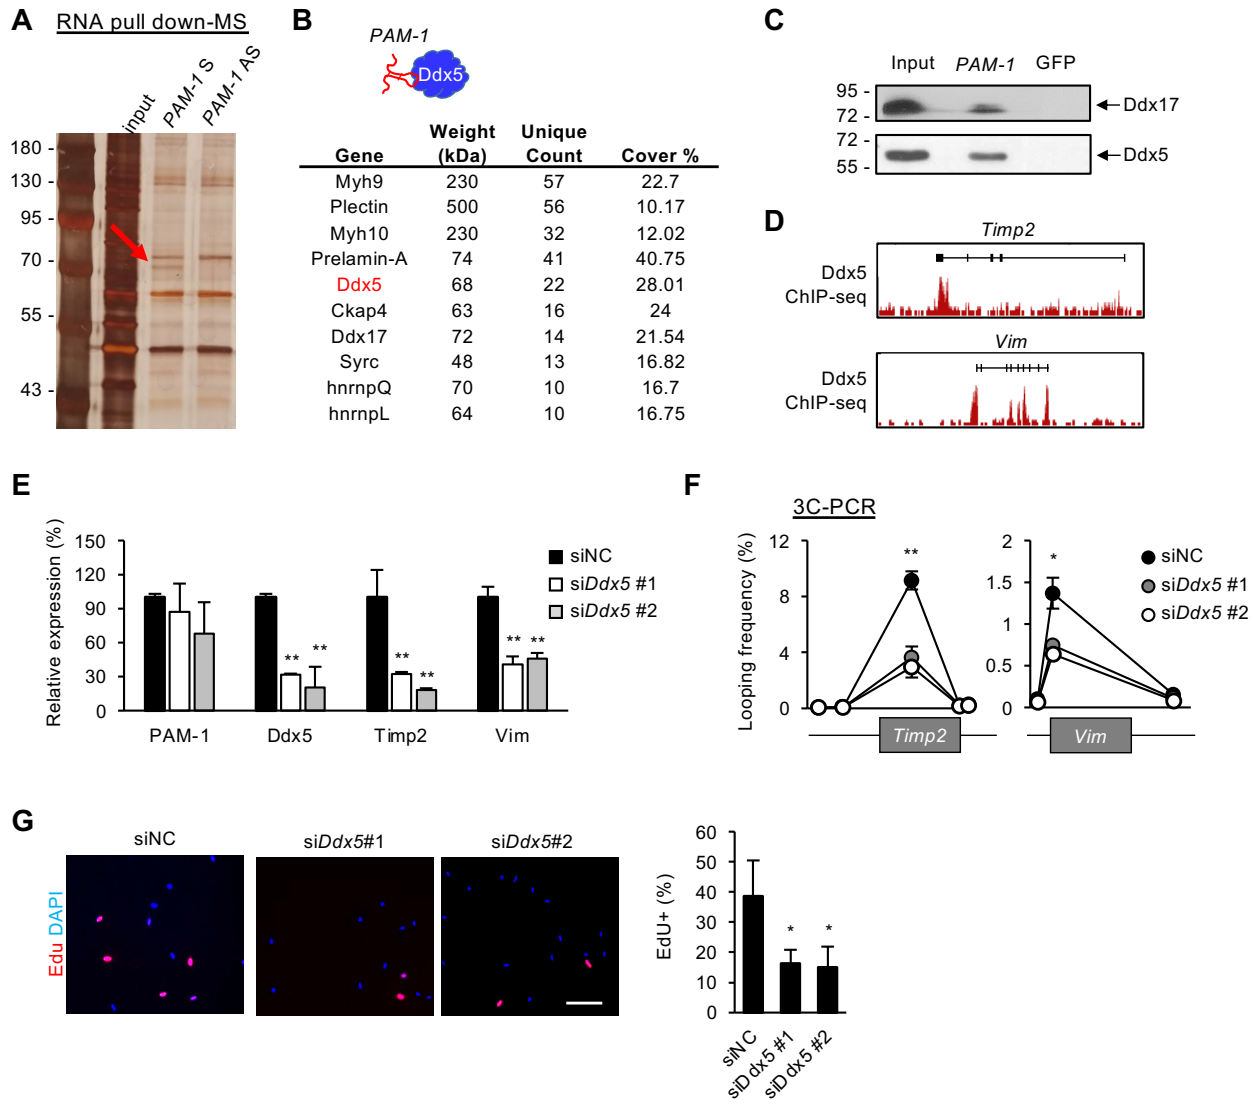

## Figure 5 So K.K.H. & Huang Y. et. al.

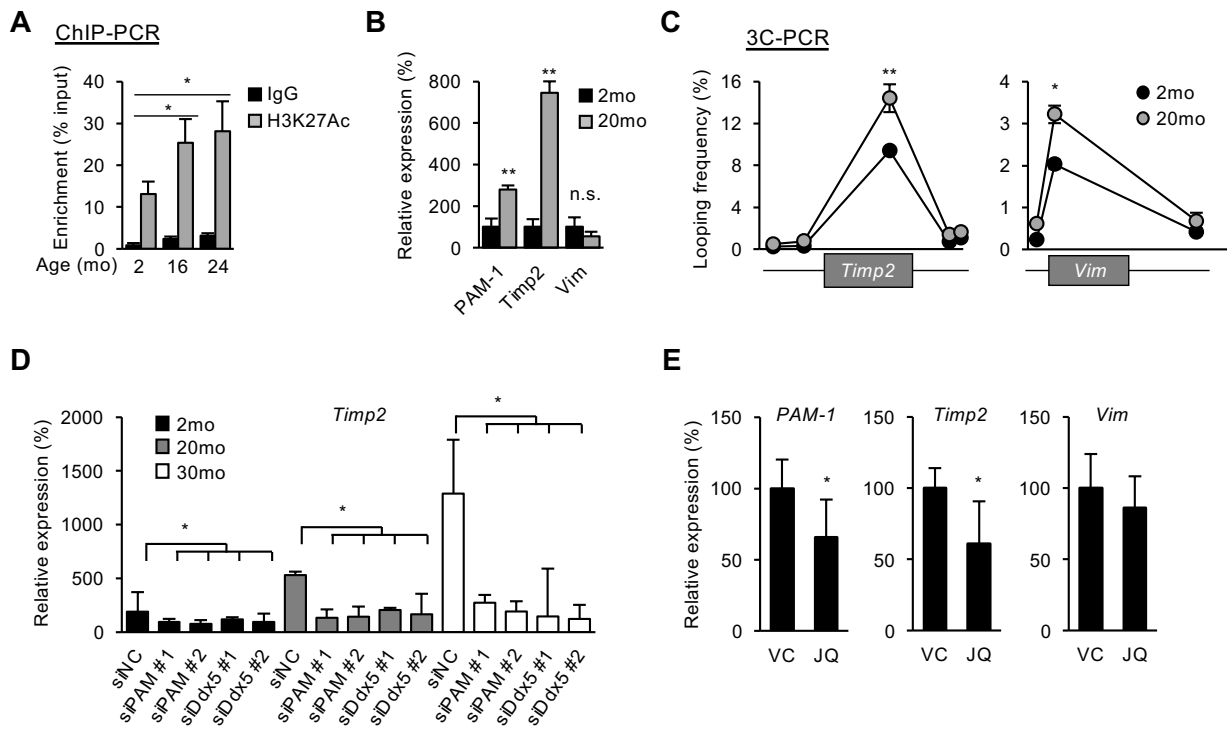

Figure 6 So K.K.H. & Huang Y. et. al.

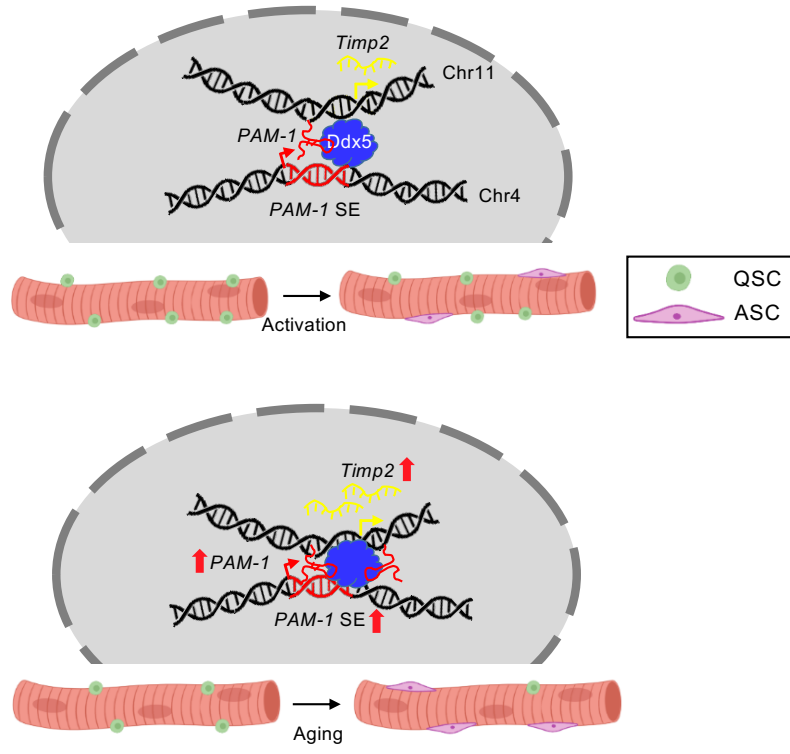

Source: https://biorxiv.org/content/10.1101/2021.10.06.463443v1.full.pdf
